# Supplementary material
Source: publisher site journal article supplement (https://en-cdn.bio-protocol.org/attached/file/20171129/Supplemental%20file%20Appendix%20I%20II%20III.docx)

**Appendix I–3C library preparation**

**Agilent ScreenTape assessments**

**3C library:**

After efficient ligation, the peak should be > 30 kb.


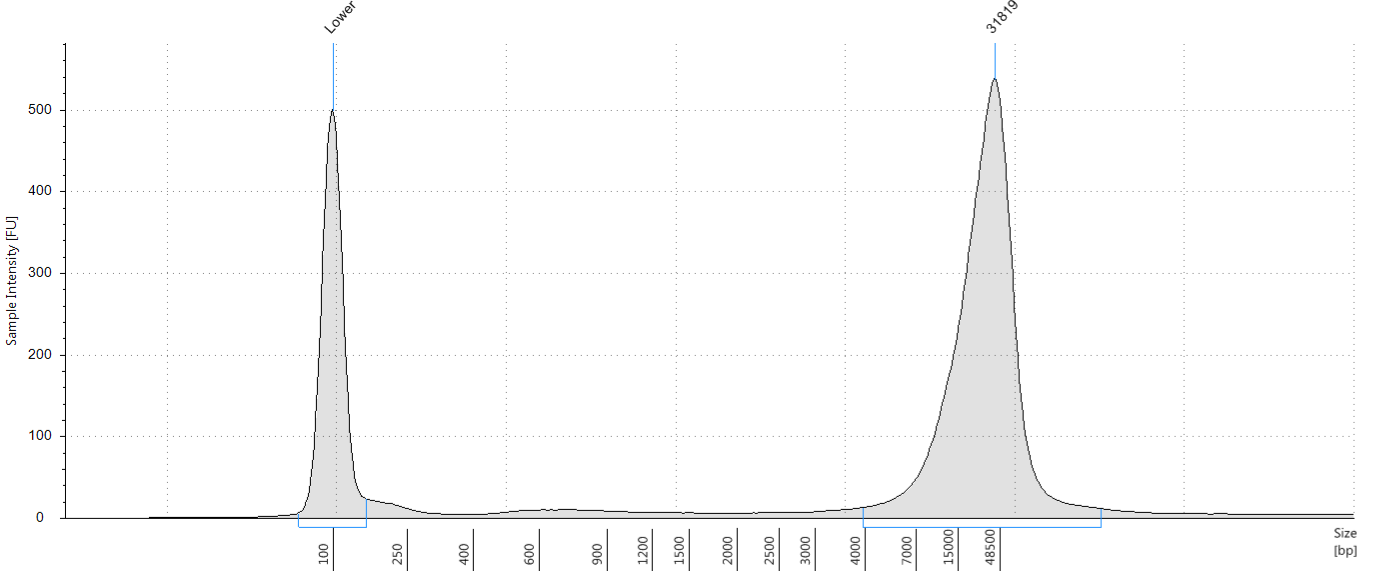


**Digestion efficiency**

*Notes:*

- - - 1. *Either the Taqman or the SYBR assay can be used to assess digestion efficiency.*
      2. *The primer sequences below are for mouse DNA. If using other species, two sets of primers should be designed: one pair spanning a DpnII restriction site, and one pair within a DpnII restriction fragment.*
      3. *PCR conditions are optimized for the Applied Biosystems Step One Plus thermocycler and should be adapted for other machines.*
      4. *Genomic DNA can be used as the undigested control. A dilution series of gDNA with the genomic primer can be used to determine DNA concentration.*

**Taqman Assay–Hba:**

**Mouse *Dpn*II digestion efficiency:**

Forward: GTGTCACCAAAACCAGCTCA (18 μM)

Reverse: CCTGGAATCCTTTGGCTCAAG (18 μM)

Probe: GGGCAGCTAAGATGCAAGTC (5 μM)

**Mouse genomiccontrol:**

Forward: TGGAGGGCATATAAGTGCTACTTG (18 μM)

Reverse: TGCTTTTGTCTTCCCCAGAGA (18 μM)

Probe: TGCAGGTCCAAGACACTTCTGATTCTGACA (5 μM)

|  | **Volume** |
| --- | --- |
| TaqMan Master Mix | 10 μl |
| Probe + Primers | 1 μl |
| Water | 7 μl |
| DNA (10 ng/μl) | 2 μl |

| Step | Temperature | Taqman |
| --- | --- | --- |
| Step 1 | 50 °C | 2 min |
| Step 2 | 95 °C | 10 min |
| Step 3 | 95 °C | 15 sec |
| Step 4 | 60 °C | 60 sec |
| Step 5 | Go to Step 3 | 40 cycles |

**SYBR Assay–PKDREJ:**

**Mouse DpnII digestion efficiency:**

Forward: GGAGAAAGAAGGCTGGTGTTAT

Reverse: TATCTGAGTTGGACAGCATTGG

**Mousegenomiccontrol:**

Forward: TTATCTTGCATTTGCCAACTCG

Reverse: TGGGTTTCCCTGATTCTGAAA

|  | **Volume** |
| --- | --- |
| 2x KAPA SYBR (+ROX) | 10.4 μl |
| Primer mix (10μM) | 0.6 μl |
| Water | 7 μl |
| DNA (10 ng/μl) | 2 μl |

| Step | Temperature | SYBR |
| --- | --- | --- |
| Step 1 | 95 °C | 20 sec |
| Step 2 | 95 °C | 3 sec |
| Step 4 | 60 °C | 30 sec |
| Step 4 | Go to Step 2 | 40 cycles |
| Step 5 | Melt curve | – |

**Example calculation:**

|  | **Probe** | **CT** | **StDev** | **∆CT**  **(DpnII-Genomic)** | **∆∆CT**  **(C1-C2)** | **Digestion efficiency1** |
| --- | --- | --- | --- | --- | --- | --- |
| **gDNA** | Genomic | 24.863 | 0.0897 | 0.397 | -2.475 | 82.013 % |
| DpnII | 25.260 | 0.0245 |
| **3C-library** | Genomic | 22.384 | 0.0399 | 2.872 |
| DpnII | 25.256 | 0.00751 |

1 Efficiency = 100 x (1-2∆CT)

**Appendix II–LI-Capture-C**

**Matching indices**

**NEBNext Primer Set 1:** 1, 2, 3, 4, 5, 6, 7, 8, 9, 10, 11, 12

**NEBNext Primer Set 2:** *13, 14, 15, 16, 18, 19, 20, 21, 22, 23, 25, 27*

**Nimblegen HE-Oligo Kit A:** 2, 4, 5, 6, 7, 12, *13, 14, 15, 16, 18, 19*

**Nimblegen HE-Oligo Kit B:** 1, 3, 8, 9, 10, 11, *20, 21, 22, 23, 25, 27*

**Agilent ScreenTape assessments**

**Sonication:**

**Post Indexing PCR:**

**Appendix III–Tag-Capture-C**

**Index primers**

| **Name** | **Primer Sequence** |
| --- | --- |
| Ad1_universal | AATGATACGGCGACCACCGAGATCTACACTCGTCGGCAGCGTCAGATGTG |
| Ad2.1_TAAGGCGA | CAAGCAGAAGACGGCATACGAGATTCGCCTTAGTCTCGTGGGCTCGGAGATGT |
| Ad2.2_CGTACTAG | CAAGCAGAAGACGGCATACGAGATCTAGTACGGTCTCGTGGGCTCGGAGATGT |
| Ad2.3_AGGCAGAA | CAAGCAGAAGACGGCATACGAGATTTCTGCCTGTCTCGTGGGCTCGGAGATGT |
| Ad2.4_TCCTGAGC | CAAGCAGAAGACGGCATACGAGATGCTCAGGAGTCTCGTGGGCTCGGAGATGT |
| Ad2.5_GGACTCCT | CAAGCAGAAGACGGCATACGAGATAGGAGTCCGTCTCGTGGGCTCGGAGATGT |
| Ad2.6_TAGGCATG | CAAGCAGAAGACGGCATACGAGATCATGCCTAGTCTCGTGGGCTCGGAGATGT |
| Ad2.7_CTCTCTAC | CAAGCAGAAGACGGCATACGAGATGTAGAGAGGTCTCGTGGGCTCGGAGATGT |
| Ad2.8_CAGAGAGG | CAAGCAGAAGACGGCATACGAGATCCTCTCTGGTCTCGTGGGCTCGGAGATGT |
| Ad2.9_GCTACGCT | CAAGCAGAAGACGGCATACGAGATAGCGTAGCGTCTCGTGGGCTCGGAGATGT |
| Ad2.10_CGAGGCTG | CAAGCAGAAGACGGCATACGAGATCAGCCTCGGTCTCGTGGGCTCGGAGATGT |
| Ad2.11_AAGAGGCA | CAAGCAGAAGACGGCATACGAGATTGCCTCTTGTCTCGTGGGCTCGGAGATGT |
| Ad2.12_GTAGAGGA | CAAGCAGAAGACGGCATACGAGATTCCTCTACGTCTCGTGGGCTCGGAGATGT |

(Buenrostro *et al*., 2013)

**Agilent ScreenTape assessments**

**Tagmentation:**


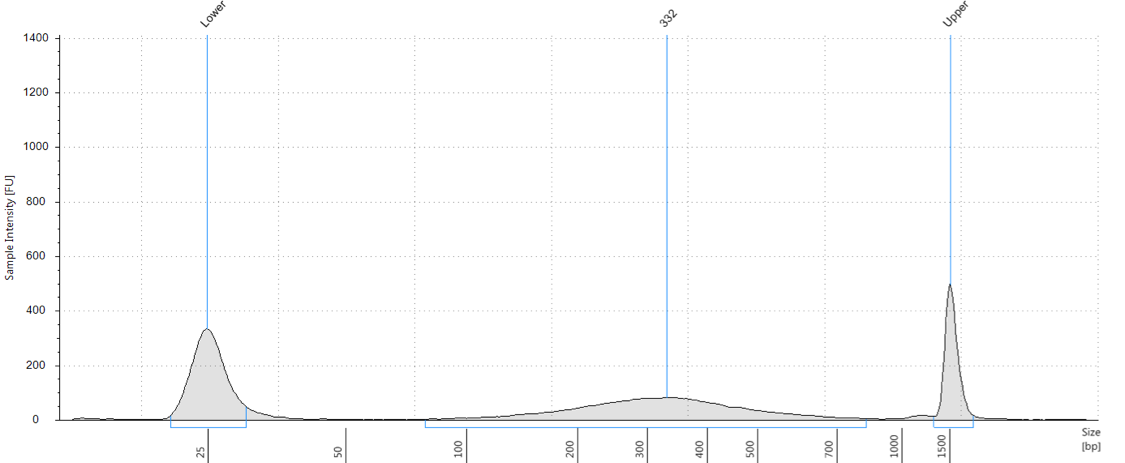


**Post Indexing PCR:**


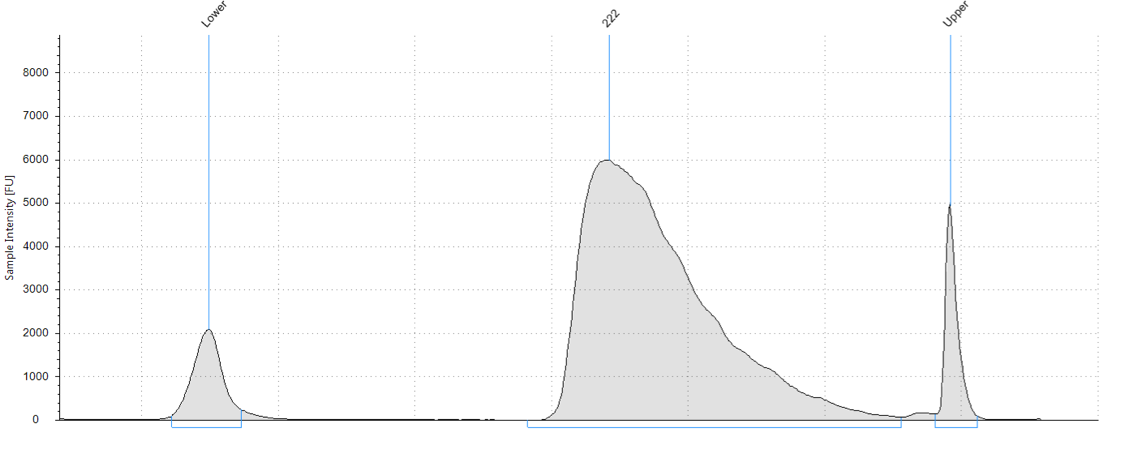

Supplement: Supplementary file 1 [file Supplemental%20file%20Appendix%20I%20II%20III.docx]
